# Supplementary material for: Preparation of core–shell structured NaYF4:Yb3+/Tm3+@NaYF4:Yb3+/Er3+ nanoparticles with high sensitivity, low resolution and good reliability and application of their fluorescence temperature properties
Source: Royal Society of Chemistry journal article supplement (doi:10.1039/d1ce01729b), 2022-01-01
Supplement: d1ce01729b1.pdf [file d1ce01729b1.pdf]

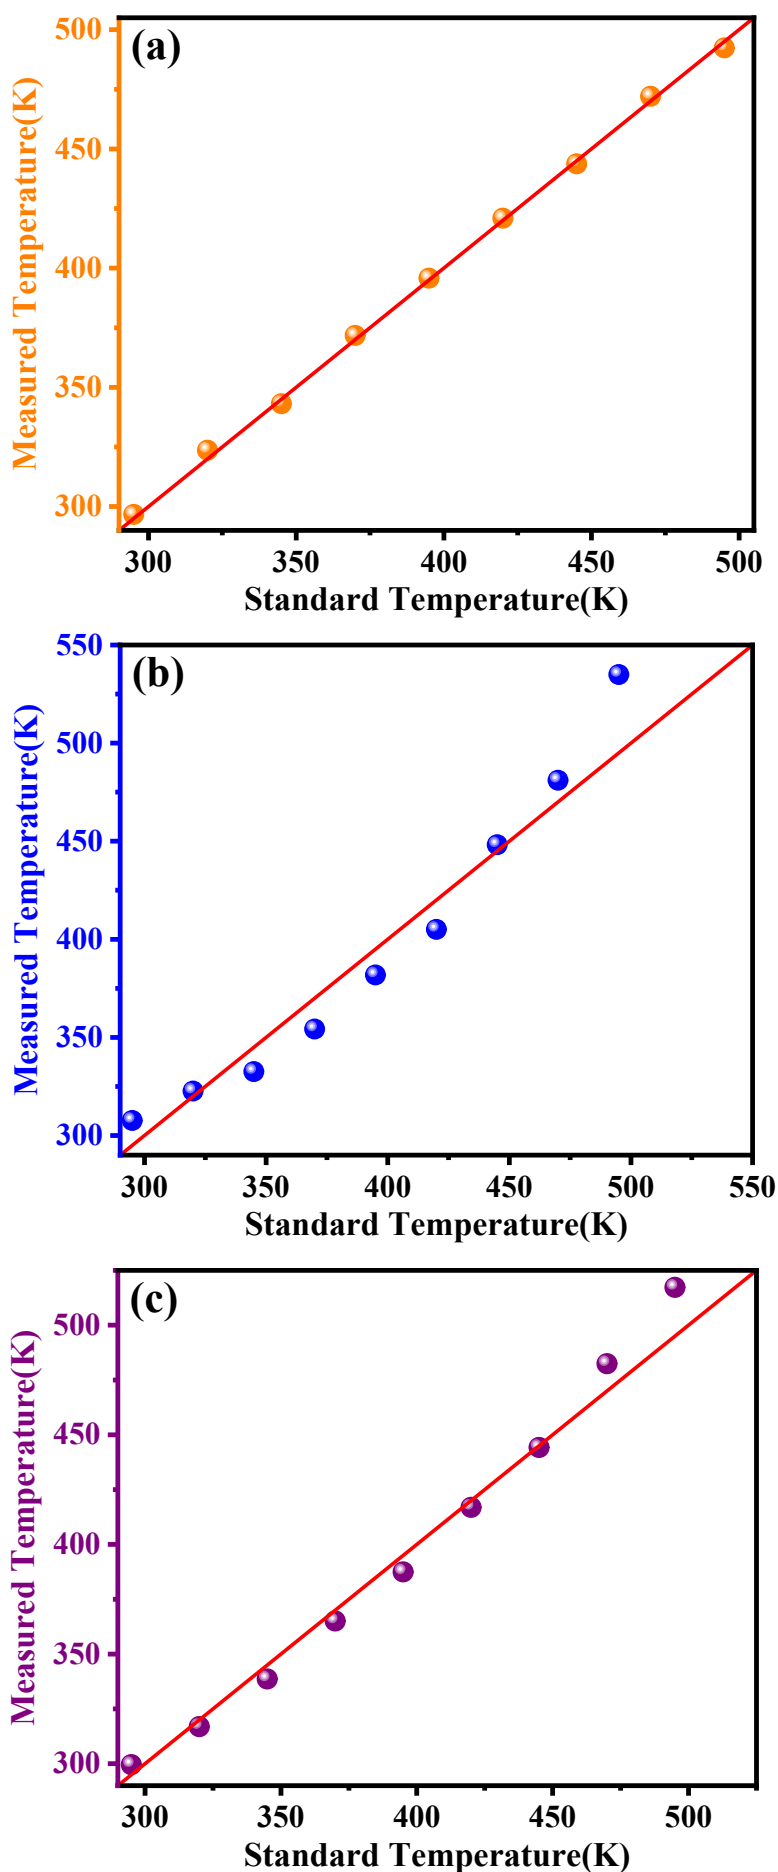

(a) The measured temperature and the standard temperature for fluorescence intensity ratio thermometry using the core-shell structure NaYF<sub>4</sub>: Yb<sup>3+</sup>/Tm<sup>3+</sup>@NaYF<sub>4</sub>: Yb<sup>3+</sup>/Er<sup>3+</sup> nanoparticles at 520 nm and 538 nm (the red line is the baseline where the measured temperature equals the standard temperature); (b) The measured temperature and the standard temperature for fluorescence intensity ratio thermometry using the bare nucleus structure NaYF<sub>4</sub>: Yb<sup>3+</sup>/Tm<sup>3+</sup> nanoparticles at 700 nm and 646 nm (the red line is the baseline where the measured temperature equals the standard temperature); (c) The measured temperature and the standard temperature for fluorescence intensity ratio thermometry using the bare nucleus structure NaYF<sub>4</sub>: Yb<sup>3+</sup>/Er<sup>3+</sup> nanoparticles at 520 nm and 538 nm (the red line is the baseline where the measured temperature equals the standard temperature).
