# Supplementary material for: Preparation of core–shell structured NaYF4:Yb3+/Tm3+@NaYF4:Yb3+/Er3+ nanoparticles with high sensitivity, low resolution and good reliability and application of their fluorescence temperature properties
Source: Royal Society of Chemistry journal article supplement (doi:10.1039/d1ce01729b), 2022-01-01
Supplement: d1ce01729b2.pdf [file d1ce01729b2.pdf]

Supplementary Material 2

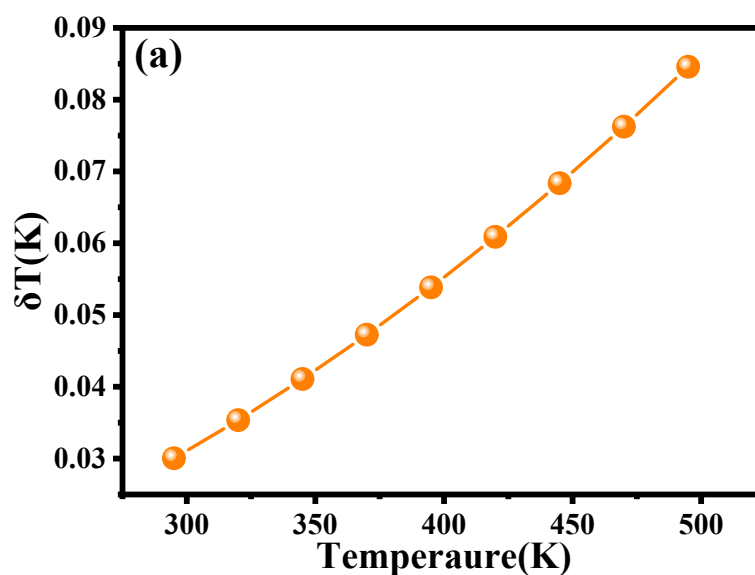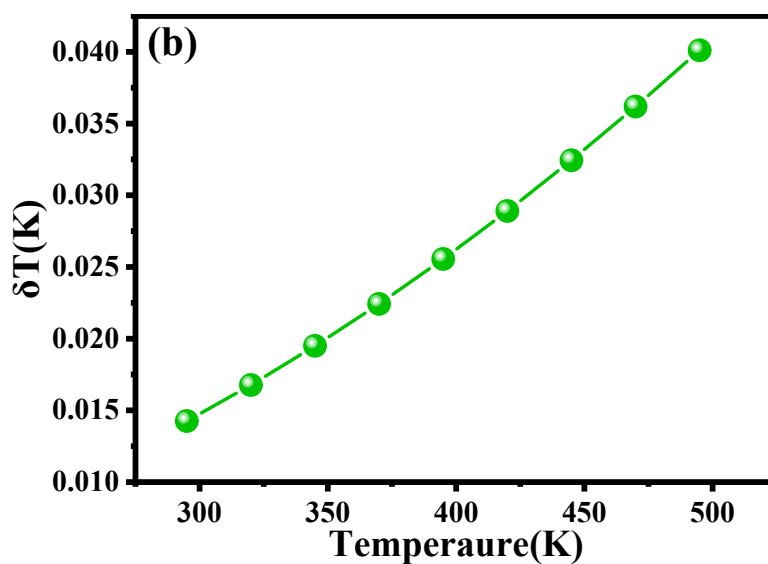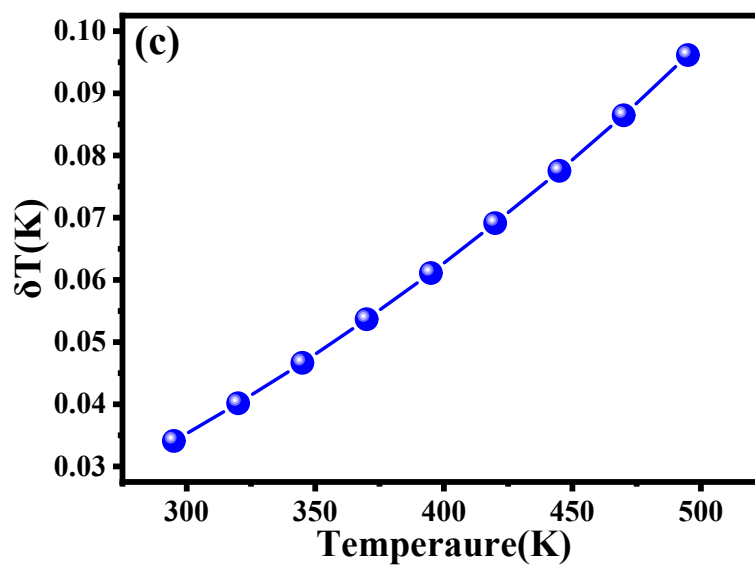

(a) Temperature resolution of the core-shell structure  $\text{NaYF}_4: \text{Yb}^{3+}/\text{Tm}^{3+}@\text{NaYF}_4: \text{Yb}^{3+}/\text{Er}^{3+}$  nanoparticles using emission peaks 520 nm and 538 nm fluorescence intensity ratios for temperature measurement; (b) Temperature resolution of the bare core structure  $\text{NaYF}_4: \text{Yb}^{3+}/\text{Tm}^{3+}$  nanoparticles using emission peaks 700 nm and 646 nm fluorescence intensity ratios for temperature measurement; (c) Temperature resolution of the bare core structure  $\text{NaYF}_4: \text{Yb}^{3+}/\text{Er}^{3+}$  nanoparticles using emission peaks 520 nm and 538 nm fluorescence intensity ratios for temperature measurement.
