# Supplementary material for: Preparation of core–shell structured NaYF4:Yb3+/Tm3+@NaYF4:Yb3+/Er3+ nanoparticles with high sensitivity, low resolution and good reliability and application of their fluorescence temperature properties
Source: Royal Society of Chemistry journal article supplement (doi:10.1039/d1ce01729b), 2022-01-01
Supplement: d1ce01729b3.pdf [file d1ce01729b3.pdf]

Supplementary Material 3

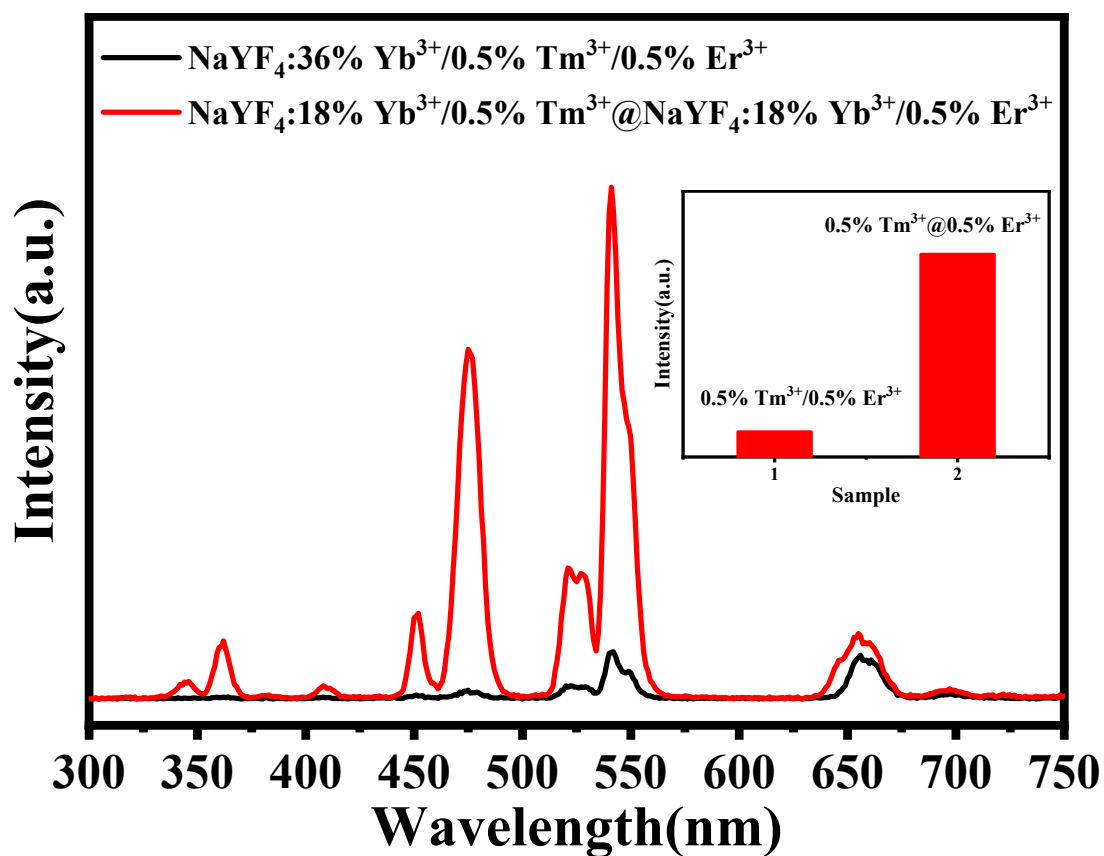

Fluorescence spectra of bare core structured NaYF<sub>4</sub>:36% Yb<sup>3+</sup>/0.5% Tm<sup>3+</sup>/0.5Er<sup>3+</sup> nanoparticles versus core-shell structured NaYF<sub>4</sub>:18% Yb<sup>3+</sup>/0.5% Tm<sup>3+</sup>@NaYF<sub>4</sub>:18% Yb<sup>3+</sup>/0.5% Er<sup>3+</sup> nanoparticles, inset is a histogram of the fluorescence integral intensity.
